# Supplementary material for: Dicer-like Enzymes with Sequence Cleavage Preferences
Source: PubMed Central journal article supplement — Cell. 2018 Mar 22;173(1):234–247.e7. doi: 10.1016/j.cell.2018.02.029 (PMC5871716; doi:10.1016/j.cell.2018.02.029), 2018-03-22
Supplement: mmc1.pdf [file mmc1.pdf]

**Cell, Volume 173**

**Supplemental Information**

**Dicer-like Enzymes**

**with Sequence Cleavage Preferences**

**Cristina Hoehener, Iris Hug, and Mariusz Nowacki**
